# Supplementary material
Source: publisher site journal article supplement (https://www.spandidos-publications.com/5886/downloadSupplementary)
Supplement: Supplementary file 1 [file downloadSupplementary]

Table SI. Effects of BC on various types of organs in an LLC cancer-cachexia mouse model.

| Organ (g) | CTRL        | CC                       | BC 4                     | BC 8                     |
|-----------|-------------|--------------------------|--------------------------|--------------------------|
| Liver     | 0.999±0.042 | 1.133±0.059              | 1.193±0.055 <sup>a</sup> | 1.227±0.046 <sup>a</sup> |
| Spleen    | 0.064±0.003 | 0.271±0.024 <sup>b</sup> | 0.324±0.014 <sup>b</sup> | 0.306±0.026 <sup>b</sup> |
| Kidney    | 0.262±0.009 | 0.249±0.007              | 0.256±0.005              | 0.259±0.004              |
| Heart     | 0.142±0.009 | 0.158±0.009              | 0.148±0.006              | 0.154±0.008              |
| Lung      | 0.168±0.004 | 0.180±0.006              | 0.171±0.011              | 0.178±0.008              |

All data are shown as the mean ±standard error of the mean and were analyzed using one-way ANOVA with a Newman-Keuls post hoc test. <sup>a</sup>P<0.05 and <sup>b</sup>P<0.001 vs. the CTRL. BC, β-carotene; LLC, Lewis lung carcinoma; CTRL, Control; CC, LLC-induced cancer cachexia; BC 4, LLC-induced cancer cachexia + 4 mg/kg body weight of BC; BC 8, LLC-induced cancer cachexia + 8 mg/kg body weight of BC.
